# Supplementary material for: What drives patients’ acceptance of Digital Therapeutics? Establishing a new framework to measure the interplay between rational and institutional factors
Source: PubMed Central journal article supplement (PMC9921481; doi:10.1186/s12913-023-09090-7), 2023-02-10
Supplement: 12913_2023_9090_MOESM1_ESM.pdf [file 12913_2023_9090_MOESM1_ESM.pdf]

## Supplementary Information

### Questionnaire

The questionnaire submitted to obese patients is reported here.

#### Part A: Demographics and personal information

| #  | Question                                                                                                     | Answers                         |
|----|--------------------------------------------------------------------------------------------------------------|---------------------------------|
| 1  | Gender                                                                                                       | Male                            |
|    |                                                                                                              | Female                          |
| 2  | Age range                                                                                                    | < 18                            |
|    |                                                                                                              | 18-30                           |
|    |                                                                                                              | 31-40                           |
|    |                                                                                                              | 41-50                           |
|    |                                                                                                              | 51-60                           |
|    |                                                                                                              | 61-70                           |
|    |                                                                                                              | >70                             |
| 3  | Weight (kg)                                                                                                  | .....                           |
| 4  | Height (cm)                                                                                                  | .....                           |
| 5  | What is your highest level of education                                                                      | Elementary                      |
|    |                                                                                                              | Lower middle school             |
|    |                                                                                                              | High school                     |
|    |                                                                                                              | Bachelor's degree               |
|    |                                                                                                              | Doctoral or postgraduate degree |
| 6  | Region of residence                                                                                          | .....                           |
| 7  | What is your occupation?                                                                                     | Student                         |
|    |                                                                                                              | Worker                          |
|    |                                                                                                              | Unemployed                      |
|    |                                                                                                              | Housemaker                      |
|    |                                                                                                              | Retired                         |
| 8  | What romantic relationship are you in?                                                                       | Single                          |
|    |                                                                                                              | I have a stable partner         |
|    |                                                                                                              | Other                           |
| 9  | How much do you agree with the following statement: "I consider myself a person who likes to be in company"? | Strongly disagree               |
|    |                                                                                                              | Disagree                        |
|    |                                                                                                              | Neutral                         |
|    |                                                                                                              | Agree                           |
|    |                                                                                                              | Strongly agree                  |
| 10 | With whom do you consume the main meals of the day?                                                          | Alone                           |
|    |                                                                                                              | With family                     |
|    |                                                                                                              | With colleagues/friends         |
| 11 | Does your household support/motivate you in maintaining/improving your health status?                        | Yes                             |
|    |                                                                                                              | No                              |
| 12 | Does your household NEGATIVELY influence your eating behavior?                                               | Yes                             |
|    |                                                                                                              | No                              |

|           |                                                                                                                          |                                                                             |
|-----------|--------------------------------------------------------------------------------------------------------------------------|-----------------------------------------------------------------------------|
| <b>13</b> | Is/would your household be involved in your care journey?                                                                | Yes                                                                         |
|           |                                                                                                                          | No                                                                          |
| <b>14</b> | How much do you agree with the following statement: "I am the main architect of my own health"?                          | Strongly disagree                                                           |
|           |                                                                                                                          | Disagree                                                                    |
|           |                                                                                                                          | Neutral                                                                     |
|           |                                                                                                                          | Agree                                                                       |
|           |                                                                                                                          | Strongly agree                                                              |
| <b>15</b> | How much do you agree with the following statement: "I use Apps on my cell phone (smartphone) with great ease"?          | Strongly disagree                                                           |
|           |                                                                                                                          | Disagree                                                                    |
|           |                                                                                                                          | Neutral                                                                     |
|           |                                                                                                                          | Agree                                                                       |
|           |                                                                                                                          | Strongly agree                                                              |
|           |                                                                                                                          | I don't have a cell phone with access to the Internet and Apps (smartphone) |
| <b>16</b> | Are you affected by one or more of these conditions? (You can select more than one answer)                               | Cardio or cerebrovascular disease                                           |
|           |                                                                                                                          | Hypertension                                                                |
|           |                                                                                                                          | Diabetes                                                                    |
|           |                                                                                                                          | Liver disease                                                               |
|           |                                                                                                                          | Osteoarthritis                                                              |
|           |                                                                                                                          | Osteoporosis                                                                |
|           |                                                                                                                          | Kidney disease                                                              |
| <b>17</b> | Are you taking or have you taken drug therapy for obesity?                                                               | Yes                                                                         |
|           |                                                                                                                          | No                                                                          |
| <b>18</b> | Have you performed any of the following health care services in the past year? (You can select more than one answer)     | Ambulatorio (Obesity Center)                                                |
|           |                                                                                                                          | MAC / Day Hospital                                                          |
|           |                                                                                                                          | Hospitalization (e.g., Piancavallo)                                         |
|           |                                                                                                                          | Bariatric Surgery                                                           |
| <b>19</b> | How much do you agree with the following statement: "My health status improved while being taken care of by Auxologico"? | Strongly disagree                                                           |
|           |                                                                                                                          | Disagree                                                                    |
|           |                                                                                                                          | Neutral                                                                     |
|           |                                                                                                                          | Agree                                                                       |
|           |                                                                                                                          | Strongly agree                                                              |
| <b>20</b> | How much do you agree with the following statement: "I am satisfied with the results obtained"?                          | Strongly disagree                                                           |
|           |                                                                                                                          | Disagree                                                                    |
|           |                                                                                                                          | Neutral                                                                     |
|           |                                                                                                                          | Agree                                                                       |
|           |                                                                                                                          | Strongly agree                                                              |
| <b>21</b> | Once you return home, do you have difficulty managing the maintenance/improvement of results over time?                  | I have no difficulty (I manage well on my own without external support)     |
|           |                                                                                                                          | Yes, I have difficulty in the area of weight maintenance/reduction          |
|           |                                                                                                                          | Yes, I have difficulty in the area of eating habits/behavior                |
|           |                                                                                                                          | Yes, I have difficulty in the area of motivation to change                  |
|           |                                                                                                                          | Yes, I have difficulties in other aspects                                   |
| <b>22</b> | Would you like to be able to be followed by health care                                                                  | I don't care                                                                |
|           |                                                                                                                          | Yes, for 1 month                                                            |

|           |                                                                                                                                                                          |                                                                                            |
|-----------|--------------------------------------------------------------------------------------------------------------------------------------------------------------------------|--------------------------------------------------------------------------------------------|
|           | professionals remotely from home, even through technological-digital tools?                                                                                              | Yes, for 3 months                                                                          |
|           |                                                                                                                                                                          | Yes, for 6 months                                                                          |
|           |                                                                                                                                                                          | Yes, for 12 months                                                                         |
|           |                                                                                                                                                                          | Yes, for a lifetime                                                                        |
| <b>23</b> | How many hours a day do you use your cell phone (smartphone)?                                                                                                            | Less than 1 hour                                                                           |
|           |                                                                                                                                                                          | 1-2 hours                                                                                  |
|           |                                                                                                                                                                          | 3-5 hours                                                                                  |
|           |                                                                                                                                                                          | 5-10 hours                                                                                 |
|           |                                                                                                                                                                          | More than 10 hours                                                                         |
| <b>24</b> | Do you use digital solutions (e.g., APPs, wearable devices such as smartwatches, smart bracelets) to manage your health (e.g., to track a diet or exercise)?             | Never                                                                                      |
|           |                                                                                                                                                                          | Rarely                                                                                     |
|           |                                                                                                                                                                          | Sometimes                                                                                  |
|           |                                                                                                                                                                          | Often                                                                                      |
|           |                                                                                                                                                                          | Always                                                                                     |
| <b>25</b> | Do you know an APP called "Noom?" (Please, read all the possible answers carefully)                                                                                      | Never heard of it                                                                          |
|           |                                                                                                                                                                          | Heard about it from some of my family/friends/colleagues, but never downloaded it          |
|           |                                                                                                                                                                          | Heard about it from some doctors, but never downloaded it                                  |
|           |                                                                                                                                                                          | I heard about it on the web/social media, but never downloaded it                          |
|           |                                                                                                                                                                          | I heard about it in some magazines and downloaded it to try it out                         |
|           |                                                                                                                                                                          | I heard about it from some of my family/friends/colleagues and downloaded it to try it out |
|           |                                                                                                                                                                          | I heard about it from some doctors and downloaded it to try it out                         |
|           |                                                                                                                                                                          | I heard about it on the web/social media and downloaded it to try it out                   |
|           |                                                                                                                                                                          | I heard about it in some magazines, but never downloaded it                                |
| <b>26</b> | Do you know of APPs for "intermittent fasting" ("fasting" in English) such as Fasting; DoFasting; Zero; Vora; 21 Day Hero? (Please, read all possible answers carefully) | Never heard of it                                                                          |
|           |                                                                                                                                                                          | Heard about it from some of my family/friends/colleagues, but never downloaded it          |
|           |                                                                                                                                                                          | Heard about it from some doctors, but never downloaded it                                  |
|           |                                                                                                                                                                          | I heard about it on the web/social media, but never downloaded it                          |
|           |                                                                                                                                                                          | I heard about it in some magazines and downloaded it to try it out                         |
|           |                                                                                                                                                                          | I heard about it from some of my family/friends/colleagues and downloaded it to try it out |
|           |                                                                                                                                                                          | I heard about it from some doctors and downloaded it to try it out                         |
|           |                                                                                                                                                                          | I heard about it on the web/social media and downloaded it to try it out                   |
|           |                                                                                                                                                                          | I heard about it in some magazines, but never downloaded it                                |

Part B: Model Measurement through Likert Scale (from 1: strongly disagree to 5: strongly agree)

| #  | Question                                                                                                                                 | 1 | 2 | 3 | 4 | 5 |
|----|------------------------------------------------------------------------------------------------------------------------------------------|---|---|---|---|---|
| 1  | I will want to use this medical APP                                                                                                      |   |   |   |   |   |
| 2  | I plan to use this medical APP in the future                                                                                             |   |   |   |   |   |
| 3  | I will want to take advantage of this medical APP to keep myself fit                                                                     |   |   |   |   |   |
| 4  | Using this medical APP will improve my lifestyle and health                                                                              |   |   |   |   |   |
| 5  | Using this medical APP will allow me to more effectively manage my care pathway                                                          |   |   |   |   |   |
| 6  | Using this medical APP will be helpful in managing my health                                                                             |   |   |   |   |   |
| 7  | Using this medical APP will NOT require a great deal of effort on my part                                                                |   |   |   |   |   |
| 8  | Using this medical APP will be intuitive and easy for me                                                                                 |   |   |   |   |   |
| 9  | When I use this medical APP on my cell phone, I will easily be able to do what I need to do                                              |   |   |   |   |   |
| 10 | I always agree with what the doctors who are treating me tell me, including about using this medical APP                                 |   |   |   |   |   |
| 11 | I always agree with the priorities given to me by the doctors in my care, including on the use of this medical APP                       |   |   |   |   |   |
| 12 | I always agree with the therapies that the doctors who treat me prescribe, including on the use of this medical APP                      |   |   |   |   |   |
| 13 | People I value most think I should use this medical APP to improve my course of treatment                                                |   |   |   |   |   |
| 14 | People I value most would use a medical APP to improve their care pathway if prescribed by their doctor                                  |   |   |   |   |   |
| 15 | People I value most think that medical APPs can help improve the care pathway if certified and validated                                 |   |   |   |   |   |
| 16 | In my circle of family/friends/colleagues, there is full confidence in technological innovation (such as, for example, this medical APP) |   |   |   |   |   |
| 17 | In my circle of family/friends/colleagues there is NO fear of trying new things (like, for example, this medical APP)                    |   |   |   |   |   |
| 18 | In my circle of family/friends/colleagues there is full openness to digital solutions (like, for example, this medical APP)              |   |   |   |   |   |
